# Supplementary material
Source: Springer Nature journal article supplement (https://www.springermedizin.de/resource/supplementary/12958_2014_1225_MOESM6_ESM.pdf/9567100)

**A**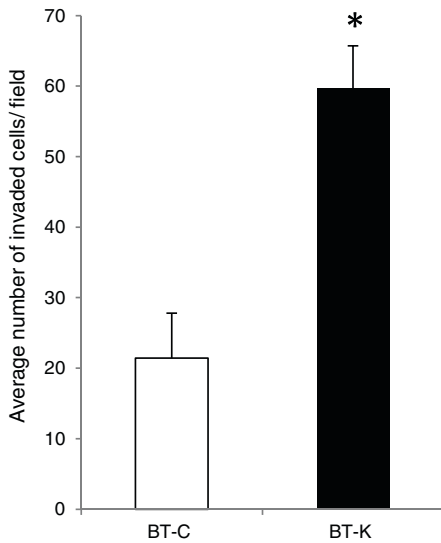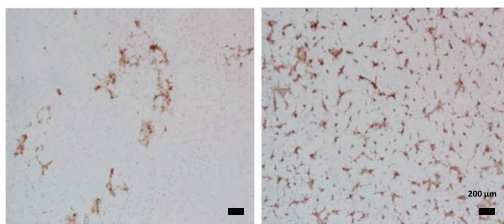**B**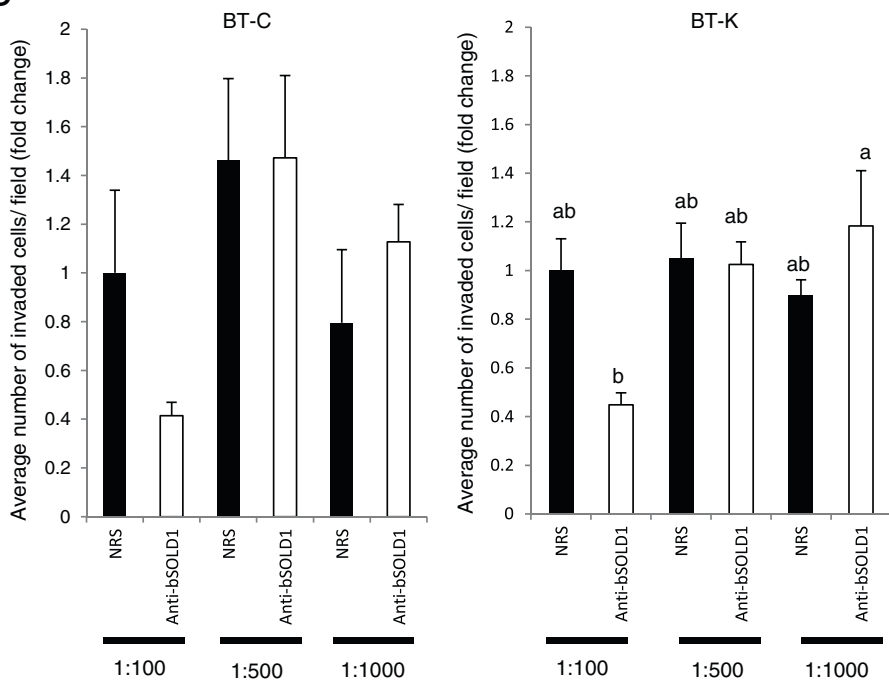

Supplement: MOESM6 [file 9567100]
